# Supplementary material
Source: PubMed Central journal article supplement (PMC7032074)

Supplemental Figure 1

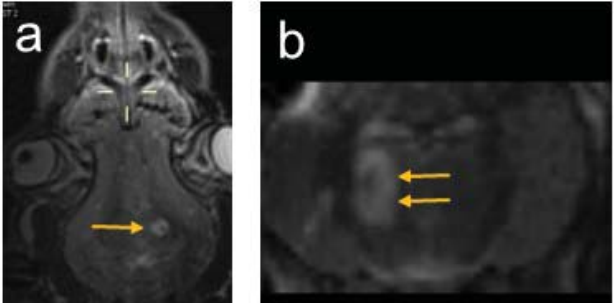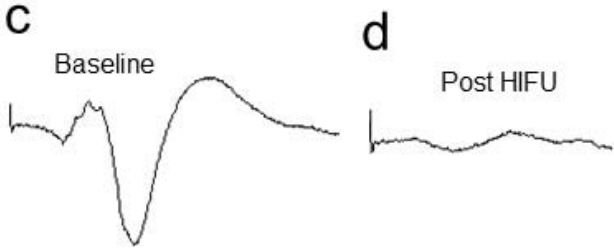

Supplement: NIHMS1552905-supplement-Supplemental_Figure_1.pdf [file NIHMS1552905-supplement-Supplemental_Figure_1.pdf]
